# Supplementary material
Source: MDPI journal article supplement (https://www.mdpi.com/2227-9040/7/3/41)
Supplement: s1 [file s1]

## Supplementary materials

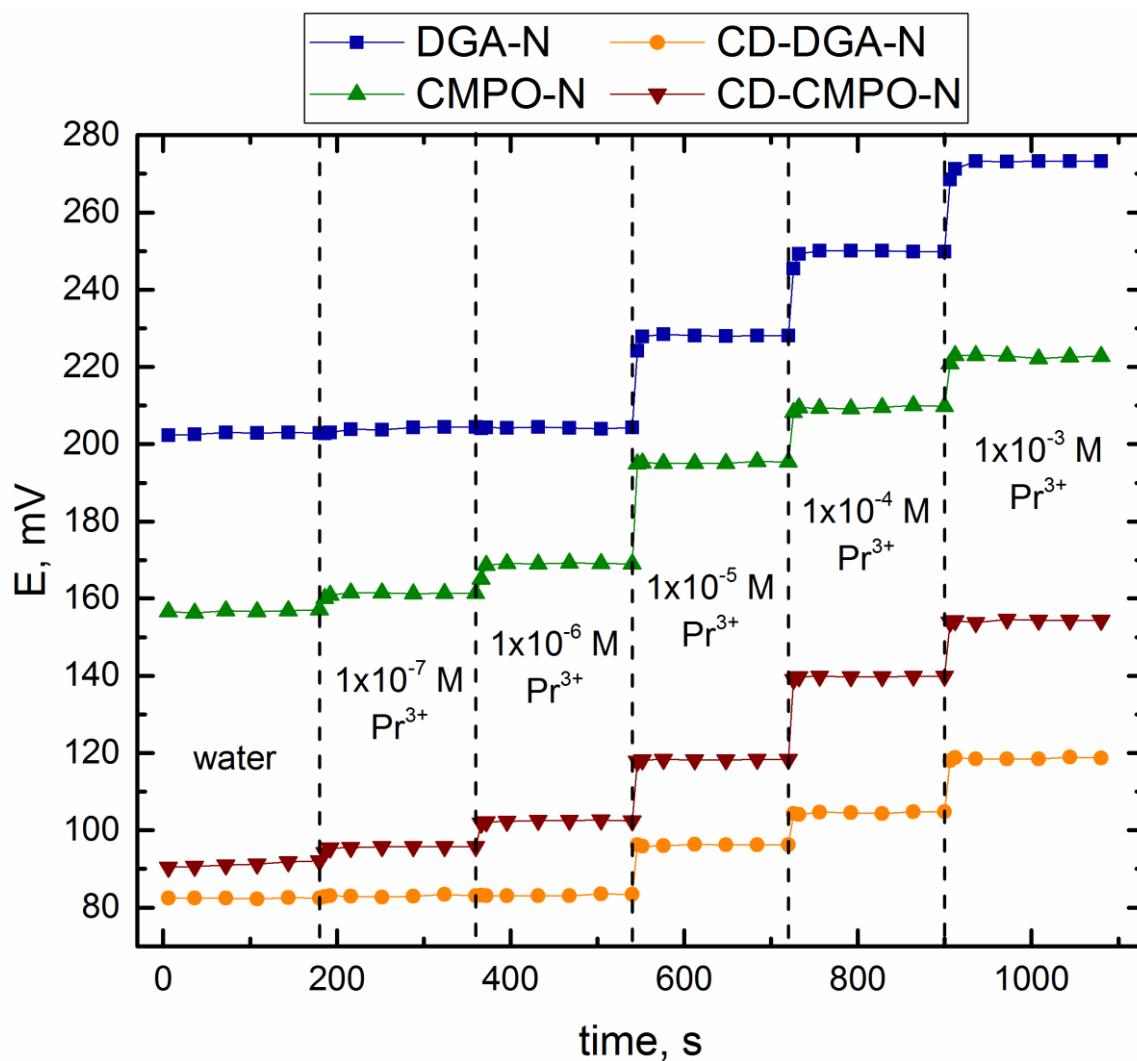

**Figure S1.** Dynamic response of the sensors DGA-N, CD-DGA-N, CMPO-N, CD-CMPO-N in presence of the praseodymium cations.
